# Supplementary material
Source: PubMed Central journal article supplement (PMC6526947)

# Supplemental Figure 2.

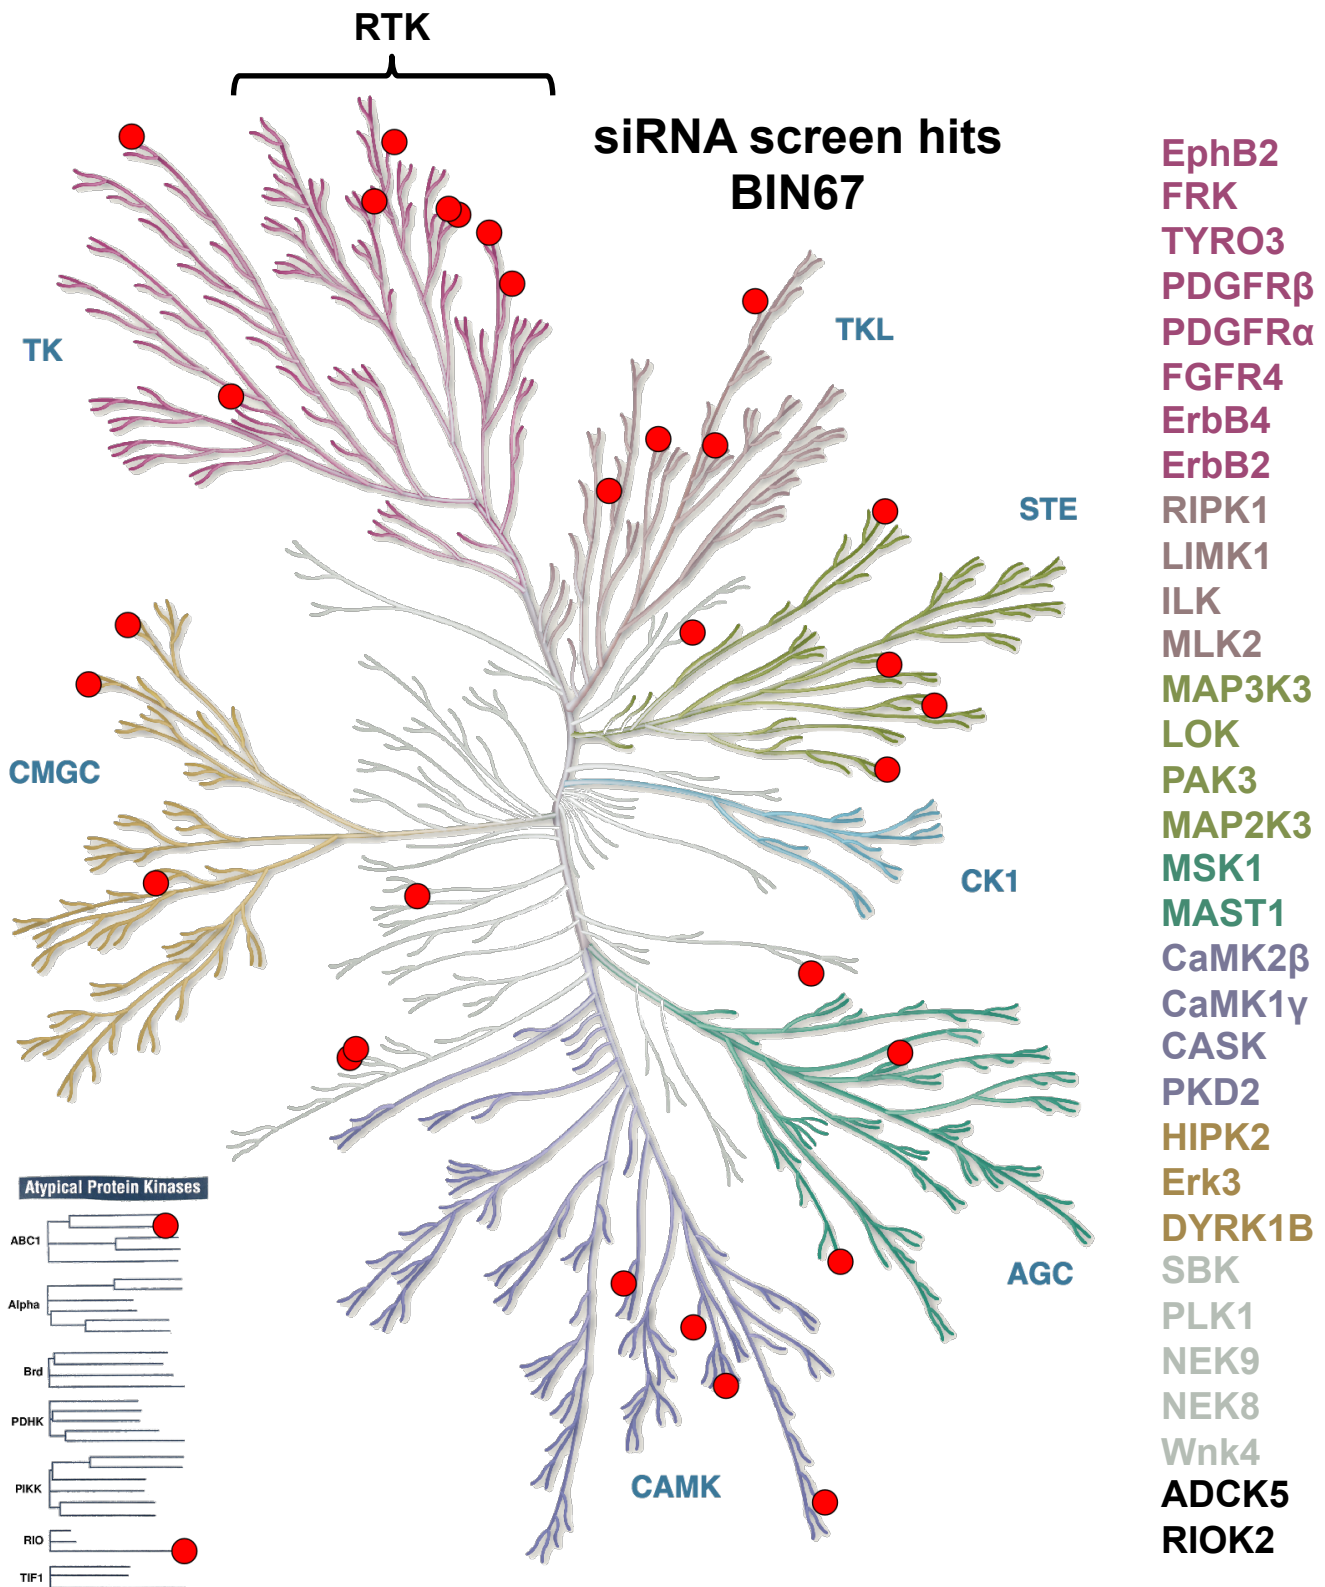

"Illustration reproduced courtesy of Cell Signaling Technology, Inc. ([www.cellsignal.com](http://www.cellsignal.com))"

# Supplemental Figure 3.

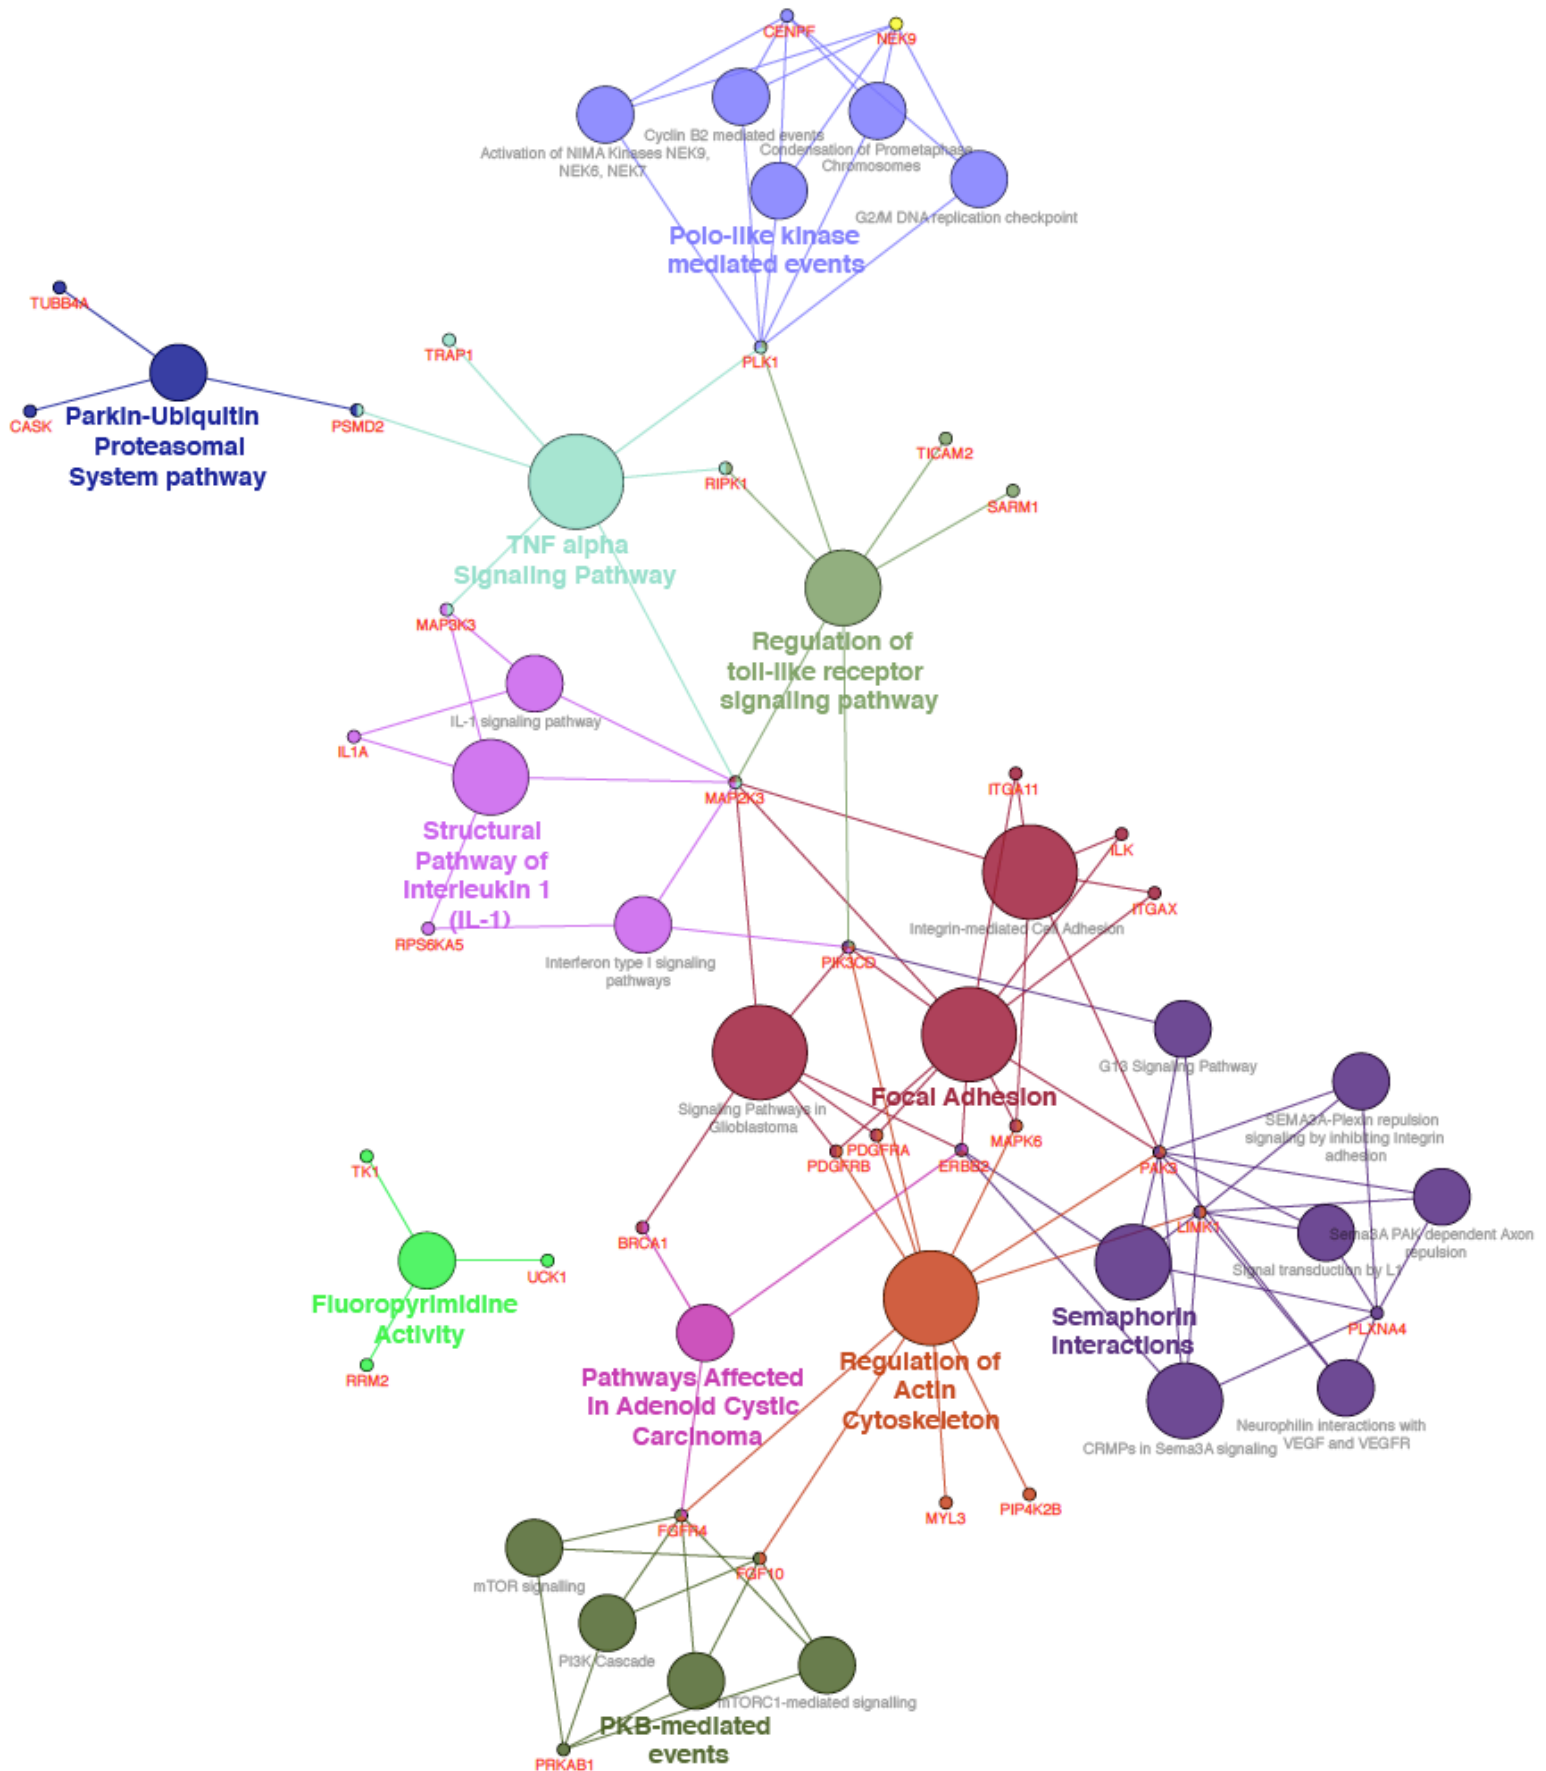

Supplement: NIHMS1027598-supplement-Supplemental_Figures_S1-3.pdf [file NIHMS1027598-supplement-Supplemental_Figures_S1-3.pdf]
